# Supplementary material for: Statistics of Weighted Brain Networks Reveal Hierarchical Organization and Gaussian Degree Distribution
Source: PLOS journal article supplement (doi:10.1371/journal.pone.0035029), 2012-06-22
Supplement: S2 (10.1371/journal.pone.0035029.s002) [file journal.pone.0035029.s002]

## SUPPLEMENT 2: QUANTILES OF WEIGHTED DEGREE DISTRIBUTIONS COMPARED TO NORMAL DISTRIBUTION

The divergence on the left side of plots is due to the fact that weights are strictly positive, but the divergence on the right side comes from the fact that as more connections are eliminated (i.e, as  $p$  decreases) the resulting connectivity diverges more from the normal distribution.

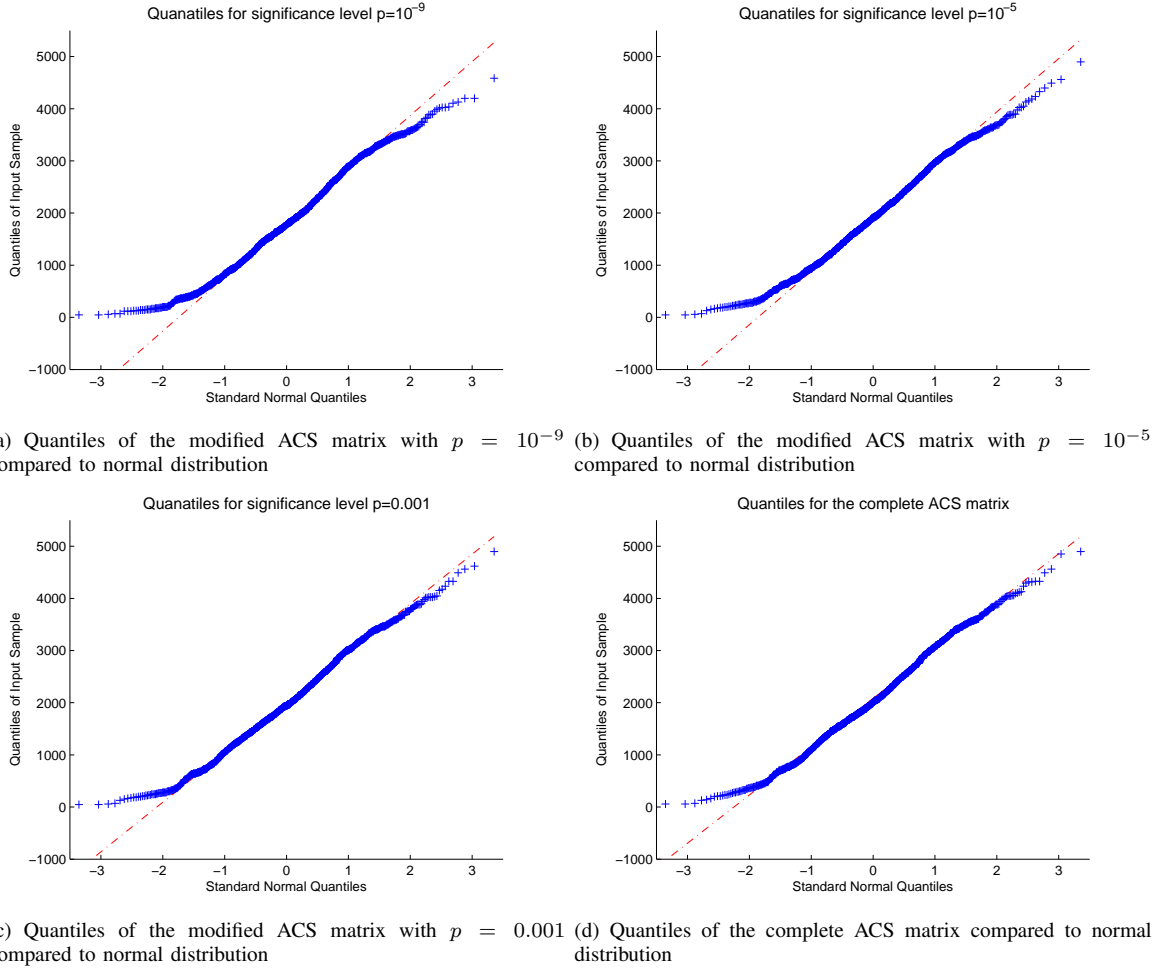

Fig. 1. Quantiles of the weighted degree distribution compared with normal distribution
